# Supplementary material for: New Zealand Journal of Asian Studies: Body, gender and revolution in twentieth century Chinese literature
Source: publisher site journal article supplement (doi:10.18632/aging.104083), 2010-06-01
Supplement: Supplementary file [file aging-v12i21-104083-supplementary-material-SD1.pdf]

**SUPPLEMENTARY FIGURE**

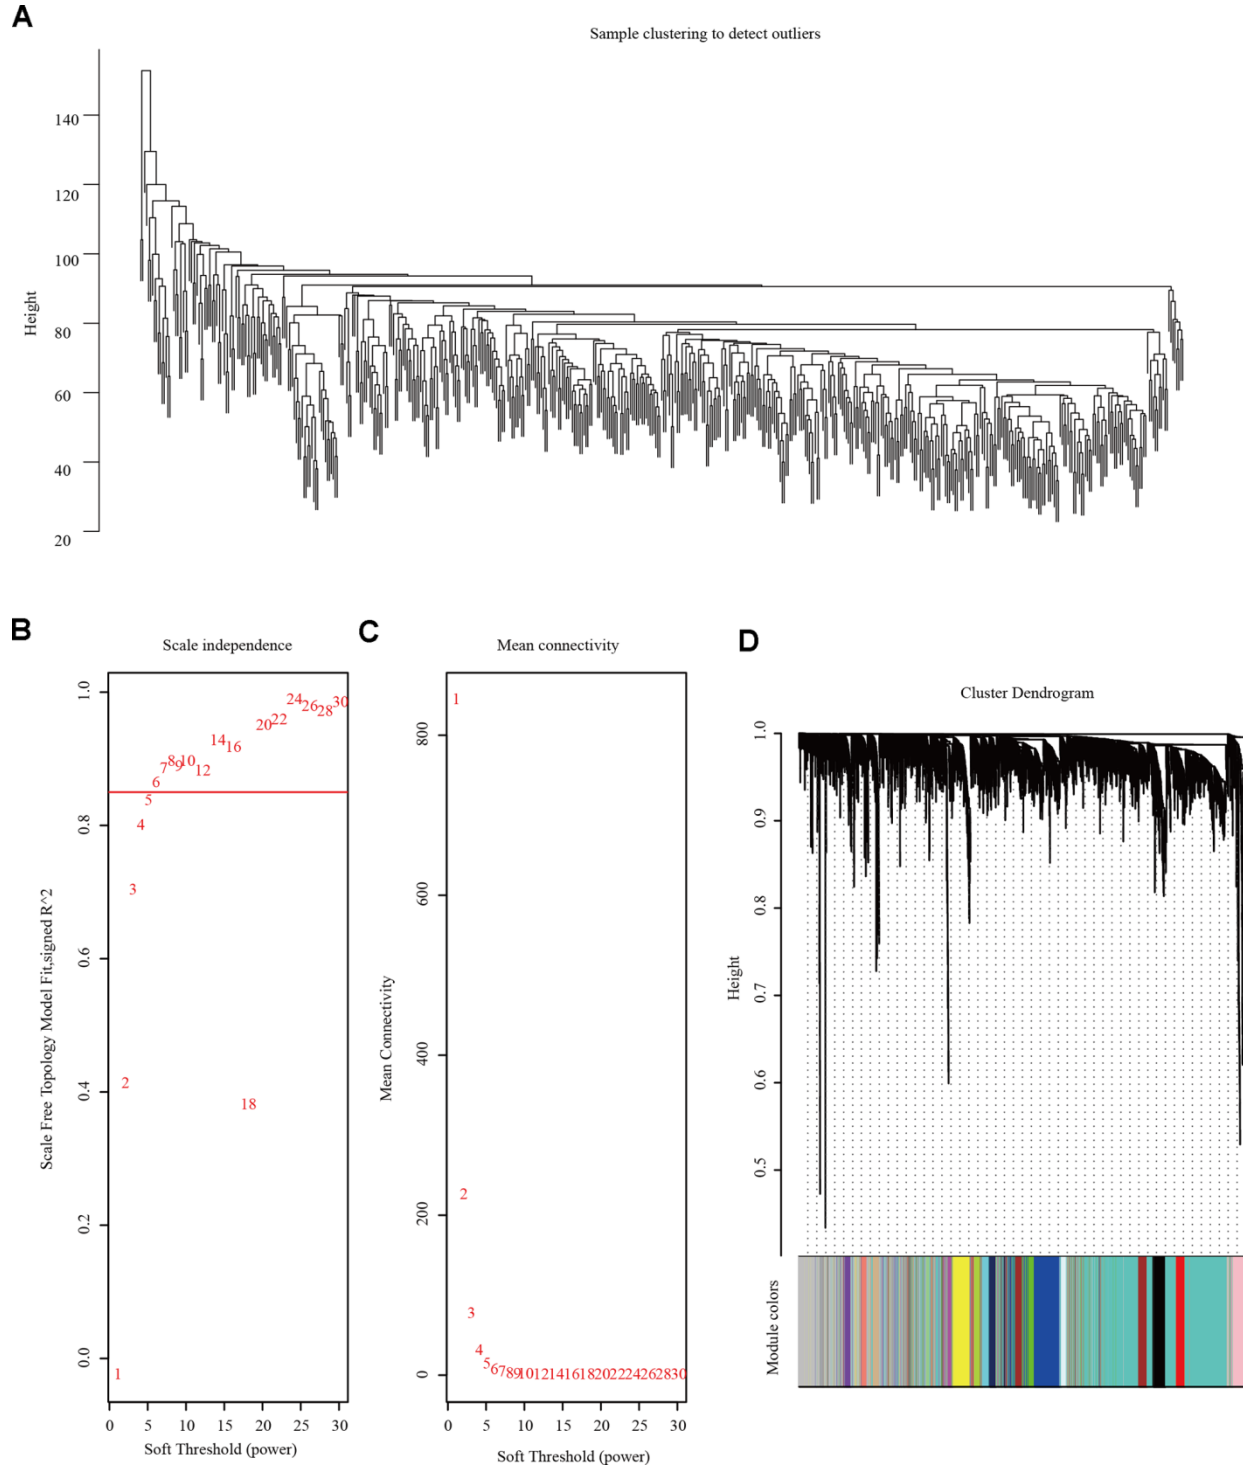

**Supplementary Figure 1. LCK metagenes-related gene modules mined through WGCNA. (A)** Sample clustering analysis. **(B–C)** Analysis of network topology under various soft-thresholding powers. **(D)** Gene dendrogram and module colors.
