# Supplementary material for: New Zealand Journal of Asian Studies: Body, gender and revolution in twentieth century Chinese literature
Source: publisher site journal article supplement (doi:10.18632/aging.104083), 2010-06-01
Supplement: Supplementary file [file aging-v12i21-104083-supplementary-material-SD4.pdf]

## SUPPLEMENTARY TABLES

**Supplementary Table 7. Primer sequences for qRT-PCR.**

| <b>Name</b> | <b>Sequence</b>                                           |
|-------------|-----------------------------------------------------------|
| CD74        | F: CTCCCAAGCCTGTGAGCAAG<br>R: TGACTCTGGAGCAGGTGCAT        |
| CD52        | F: CGCTTCCTCTTCCTCCTACTCACC<br>R: TCCGCTTATGTTGCTGGATGCTG |
| HLA-DPB1    | F: CGGATTTCTACCCAGGCAGCATT<br>R: TACGGATCAGGTTGGTGGACACG  |
| HLA-DRB1    | F: AGCGGCGAGTCCATCCTAAGG<br>R: ACCACTCACAGAACAGACCAGGAG   |
| TNFRSF1B    | F: CACGCAGCCAACTCCAGAACC<br>R: AGTCGCCAGTGCTCCCTTCAG      |
| ACP5        | F: CTTTGTAGCCGTGGGTGACTGG<br>R: CGAGCGATCTCCTTGGCATTGG    |
| HLA-DRB5    | F: CACAGTGGAATGGAGAGCACAGTC<br>R: GAGCAGGCCCAGCACAAAGC    |
| GAPDH       | F: GCACCGTCAAGGCTGAGAAC<br>R: TGGTGAAGACGCCAGTGGA         |

**Supplementary Table 8. Primary antibodies used for the detection of protein expression.**

| <b>Name</b> | <b>Manufacturer</b>                      | <b>Dilution ratio: Western blotting,<br/>Immunohistochemistry</b> |
|-------------|------------------------------------------|-------------------------------------------------------------------|
| CD74        | Affinity Biosciences.OH.USA              | 1:400                                                             |
| CD52        | Affinity Biosciences.OH.USA              | 1:200                                                             |
| HLA-DPB1    | Abcam, Cambridge, UK                     | 1:400                                                             |
| HLA-DRB1    | Cell Signaling Technology, Inc., Danvers | 1:200                                                             |
| HLA-DRB5    | Abcam, Cambridge, UK                     | 1:1000                                                            |
